# Supplementary material for: Calcium Imaging Analysis of Cellular Responses to Hypercapnia and Hypoxia in the NTS of Newborn Rat Brainstem Preparation
Source: Frontiers journal article supplement (doi:10.3389/fphys.2021.645904), 2021-03-25
Supplement: Data_Sheet_1.PDF [file Data_Sheet_1.PDF]

**SUPPL. TABLE 1.** Characteristics of excitation in response to stimulations.

|                 |                    | N  | Duration of<br>excitation (s) |          | $\Delta F/F \times 100$ |
|-----------------|--------------------|----|-------------------------------|----------|-------------------------|
| <b>Standard</b> | Hypercapnia        | 49 | 31.3 $\pm$ 33.7               |          | 12.1 $\pm$ 7.9          |
|                 | Hypoxia            | 39 | 48.6 $\pm$ 44.8               |          | 10.4 $\pm$ 5.4          |
|                 | Low K <sup>+</sup> | 43 | 72.4 $\pm$ 40.9               | *** \$   | 9.5 $\pm$ 4.8           |
| <b>Cocktail</b> | Hypercapnia        | 38 | 28.7 $\pm$ 31.9               |          | 10.5 $\pm$ 5.2          |
|                 | Hypoxia            | 40 | 40.3 $\pm$ 43.9               |          | 9.9 $\pm$ 5.3           |
|                 | Low K <sup>+</sup> | 33 | 52.1 $\pm$ 41.5               | *        | 8.1 $\pm$ 3.8           |
| <b>TTX</b>      | Hypercapnia        | 34 | 22.9 $\pm$ 24.4               |          | 8.7 $\pm$ 5.1           |
|                 | Hypoxia            | 35 | 35.8 $\pm$ 31.9               |          | 6.9 $\pm$ 3.8 * \$\$    |
|                 | Low K <sup>+</sup> | 30 | 69.8 $\pm$ 53.7               | *** \$\$ | 6.2 $\pm$ 2.8 **        |
| <b>FA</b>       | Hypercapnia        | 24 | 33.2 $\pm$ 38.0               |          | 7.5 $\pm$ 3.5 *         |
|                 | Hypoxia            | 18 | 42.2 $\pm$ 44.4               |          | 7.3 $\pm$ 3.4           |
|                 | Low K <sup>+</sup> | 12 | 45.4 $\pm$ 41.2               |          | 6.1 $\pm$ 3.3 *         |

Standard, in standard solution; Cocktail, in cocktail blockers solution; TTX, in 0.5  $\mu$ M solution; FA, in 5 mM fluoroacetate + 0.5  $\mu$ M TTX solution. Hypercapnia, cells that responded to hypercapnic stimulation (2% CO<sub>2</sub>→8% CO<sub>2</sub>); Hypoxia, cells that responded to hypoxic stimulation (95% O<sub>2</sub>→0% O<sub>2</sub>); Low K<sup>+</sup>, cells that responded to low K<sup>+</sup> solution. Duration of excitation (s), duration that fluorescence intensity increased compared with the baseline.  $\Delta F/F \times 100$ ,  $\Delta F/F$  (percentage) of the peak value. Duration of peak (s) was analyzed in each group; \* $P$  < 0.05, \*\*\* $P$  < 0.001; compared with Hypercapnia and \$ $P$  < 0.05, \$\$ $P$  < 0.01; compared with Hypoxia (by one-way ANOVA followed by Tukey–Kramer multiple comparisons test).  $\Delta F/F$  in each group did not differ significantly. Difference of  $\Delta F/F$  in each stimulus condition was significant in some cases; \* $P$  < 0.05, \*\* $P$  < 0.01; compared with those in the standard solution; \$\$ $P$  < 0.01; compared with that in cocktail blockers solution (by one-way ANOVA followed by Tukey–Kramer multiple comparisons test).
